# Supplementary material for: Structure solution of DNA-binding proteins and complexes with ARCIMBOLDO libraries
Source: PubMed Central journal article supplement (PMC4051508; doi:10.1107/s1399004714007603), 2014-05-30
Supplement: d-70-01743-sup1.pdf [file d-70-01743-sup1.pdf]

# Acta Crystallographica Section D

Volume 70 (2014)

Supporting information for article:

Structure solution of DNA binding proteins and complexes with  
*ARCIMBOLDO* libraries

Kevin Pröpper, Kathrin Meindl, Massimo Sammito, Birger Dittrich, George M. Sheldrick, Ehmke Pohl and Isabel Usón

**Table S1** Zinc-finger type.

| PDB  | Description             | Res.<br>[Å] | R/R <sub>free</sub> [%] | Reference                                | rmsd/No<br>of C $\alpha$ * | No of<br>C $\alpha$ ** | No. in<br>Fig. 3<br>(Chain) |
|------|-------------------------|-------------|-------------------------|------------------------------------------|----------------------------|------------------------|-----------------------------|
| 1A1G | Zif268-<br>DNA          | 1.9         | 0.215/0.27              | (Elrod-Erickson <i>et al.</i> ,<br>1998) | 0.8/30                     | 30                     | 1                           |
| 1A1H | Zif268-<br>DNA          | 1.6         | 0.235/0.277             | (Elrod-Erickson <i>et al.</i> ,<br>1998) | 0.6/30                     | 30                     | 2                           |
| 1A1I | Zif268-<br>DNA          | 1.6         | 0.191/0.216             | (Elrod-Erickson <i>et al.</i> ,<br>1998) | 0.6/29                     | 29                     | 3                           |
| 1A1J | Zif268-<br>DNA          | 2.0         | 0.210/0.262             | (Elrod-Erickson <i>et al.</i> ,<br>1998) | 0.5/30                     | 30                     | 4                           |
| 1A1K | Zif268-<br>DNA          | 1.90        | 0.210/0.259             | (Elrod-Erickson <i>et al.</i> ,<br>1998) | 0.6/30                     | 30                     | 5                           |
| 1A1L | Zif268-<br>DNA          | 2.30        | 0.196/0.267             | (Elrod-Erickson <i>et al.</i> ,<br>1998) | 0.6/30                     | 30                     | 6                           |
| 1AAY | Zif268-<br>DNA          | 1.60        | 0.195/0.242             | (Elrod-Erickson <i>et al.</i> ,<br>1998) | 0.5/30                     | 30                     | 7                           |
| 1F2I | Zinc-finger-<br>DNA     | 2.35        | 0.215/0.256             | (Wang <i>et al.</i> , 2001)              | 0.5/31                     | 31                     | 8 (G)<br>9 (H)<br>10 (K)    |
| 1G2D | Zinc-finger-<br>DNA     | 2.20        | 0.225/0.262             | (Wolfe <i>et al.</i> , 2001)             | 0.6/31                     | 31                     | 11 (C)<br>12 (F)            |
| 1G2F | Cys2His2<br>Zinc-finger | 2.00        | 0.233/0.263             | (Wolfe <i>et al.</i> , 2001)             | 0.6/31                     | 31                     | 13 (C)                      |
| 1JK1 | Zif-268-<br>DNA         | 1.90        | 0.214/0.266             | (Miller & Pabo, 2001)                    | 0.5/30                     | 30                     | 14                          |
| 1JK2 | Zif268-<br>DNA          | 1.65        | 0.230/0.273             | (Miller & Pabo, 2001)                    | 0.7/30                     | 30                     | 15 (A)                      |
| 1LLM | Zif23-<br>GCN4-DNA      | 1.5         | 0.216/0.234             | (Wolfe <i>et al.</i> , 2003)             | 0.7/29                     | 29                     | 16 (C)<br>17 (D)            |
| 1MEY | Zinc-finger-<br>DNA     | 2.2         | 0.224/0.319             | (Kim & Berg, 1996)                       | 0.7/29                     | 29                     | 18 (C)<br>19 (F)            |
| 1P47 | Tandem-Zif-<br>DNA      | 2.2         | 0.219/0.267             | (Peisach & Pabo, 2003)                   | 0.6/30                     | 30                     | 20 (B)<br>21 (A)            |

|      |                                     |      |             |                                 |        |    |                            |
|------|-------------------------------------|------|-------------|---------------------------------|--------|----|----------------------------|
| 1TF6 | TFIIIA-Zif-<br>DNA                  | 3.1  | 0.308/0.363 | (Nolte <i>et al.</i> , 1998)    | 0.9/31 | 31 | 22                         |
| 1UBD | YY1-DNA                             | 2.50 | 0.212/0.33  | (Houbaviy <i>et al.</i> , 1996) | 0.7/31 | 31 | 23                         |
| 1UN6 | Zinc-finger-<br>RNA                 | 3.1  | 0.216/0.259 | (Lu <i>et al.</i> , 2003)       | 1.4/31 | 30 | 24 (B)<br>25 (C)<br>26 (D) |
| 1ZAA | Zif268-<br>DNA                      | 2.1  | 0.182/n.a.  | (Pavletich & Pabo, 1991)        | 0.6/30 | 30 | 27                         |
| 2DRP | Zinc-finger-<br>DNA                 | 2.80 | 0.193/n.a.  | (Fairall <i>et al.</i> , 1993)  | 1.7/29 | 27 | 28 (A)<br>29 (D)           |
| 2GLI | Five-finger-<br>DNA                 | 2.60 | 0.228/n.a.  | (Pavletich & Pabo, 1993)        | 0.7/31 | 31 | 30                         |
| 2HGH | TFIII Zinc-<br>finger               | NMR  | NMR         | (Lee <i>et al.</i> , 2006)      | 1.2/31 | 31 | 31                         |
| 2I13 | Aart-DNA                            | 1.96 | 0.203/0.249 | (Segal <i>et al.</i> , 2006)    | 0.6/29 | 29 | 32 (B)<br>33 (A)           |
| 2J7J | Zinc-finger-<br>DNA                 | 1.65 | 0.218/0.228 | (Lu & Klug, 2007)               | 1.7/31 | 30 | 34                         |
| 2JP9 | Wilms-<br>Tumor Zinc-<br>finger-DNA | NMR  | NMR         | (Stoll <i>et al.</i> , 2007)    | 0.7/29 | 29 | 35                         |
| 2JPA | Wilms<br>Factor Zinc-<br>finger     | NMR  | NMR         | (Stoll <i>et al.</i> , 2007)    | 1.5/31 | 30 | 36                         |
| 2KMK | Gfi-1 Zinc-<br>finger-DNA           | NMR  | NMR         | (Lee <i>et al.</i> , 2010)      | 0.8/29 | 30 | 37                         |
| 2PRT | Wilms-<br>Tumor Zinc-<br>finger-DNA | 3.15 | 0.236/0.277 | (Stoll <i>et al.</i> , 2007)    | 0.5/31 | 31 | 38                         |
| 2WBU | KLF4-DNA                            | 2.5  | 0.220/0.278 | (Schuetz <i>et al.</i> , 2011)  | 0.4/31 | 31 | 39                         |
| 3IUF | C2H2 Zinc-<br>finger                | 1.8  | 0.195/0.237 | (Zhang <i>et al.</i> , 2011)    | 1.6/28 | 26 | 40                         |
| 3MJH | C2H2 Zinc-<br>finger                | 2.0  | 0.196/0.260 | (Mishra <i>et al.</i> , 2010)   | 1.5/27 | 27 | 41 (B)<br>42 (D)           |

\* number of equivalent C $\alpha$ -atoms used by DALI.

\*\* number of C $\alpha$ -atoms in the pdb files used for ARCIMBOLDO trials.

**Table S2** Zipper-type.

| PDB  | Description        | Res. [Å] | R/R <sub>free</sub> [%] | reference                      | No of C $\alpha$ ** |
|------|--------------------|----------|-------------------------|--------------------------------|---------------------|
| 1GTW | C/EPB beta-DNA     | 1.85     | 0.231/0.271             | PDB                            | 30+29               |
| 1H8A | c-Myb/EPB beta-DNA | 2.23     | 0.245/0.288             | (Tahirov <i>et al.</i> , 2002) | 30+30               |
| 1JNM | Jun/Cre-DNA        | 2.20     | 0.228/0.286             | PDB                            | 30+30               |
| 2C9L | Zipper-DNA         | 2.25     | 0.232/0.264             | (Petosa <i>et al.</i> , 2006)  | 30+30               |
| 2H7H | Jun BZIP-DNA       | 2.3      | 0.224/0.274             | PDB                            | 30+30               |

\*\* number of C $\alpha$ -atoms in the pdb files used for ARCIMBOLDO trials.

**Table S3** Three-helix bundle HTH.

| PDB  | Description                  | Res. [Å] | R/R <sub>free</sub> [%] | reference                              | rmsd/No of C $\alpha$ * | No of C $\alpha$ ** |
|------|------------------------------|----------|-------------------------|----------------------------------------|-------------------------|---------------------|
| 1i6x | Star mutant CRP              | 2.2      | 0.230/0.2691            | PDB                                    | 0.48/14                 | 54                  |
| 1lj9 | SlyA                         | 1.60     | 0.248/0.275             | (Wu <i>et al.</i> , 2003)              | 1.05/23                 | 41                  |
| 1rp3 | sigma/anti sigma complex     | 2.3      | 0.242/0.262             | (Sorenson <i>et al.</i> , 2004)        | 3.21/23                 | 46                  |
| 1sfx | transcriptional regulator    | 1.55     | 0.150/0.183             | PDB                                    | 3.21/23                 | 41                  |
| 1tqm | Rio2                         | 1.99     | 0.174/0.228             | (LaRonde-LeBlanc & Wlodawer, 2004)     | 0.97/26                 | 46                  |
| 1zar | Rio2 with ADP                | 1.75     | 0.185/0.218             | (LaRonde-LeBlanc <i>et al.</i> , 2005) | 0.98/26                 | 46                  |
| 1zyr | Tt RNA polymerase            | 3.0      | 0.261/0.282             | (Tuske <i>et al.</i> , 2005)           |                         | 44                  |
| 2hr3 | PA transcriptional regulator | 2.4      | 0.212/0.280             | PDB                                    | 1.16/26                 | 42                  |
| 2hyf | BS MntR                      | 2.80     | 0.217/0.277             | (DeWitt <i>et al.</i> , 2007)          | 1.20/26                 | 45                  |
| 2it0 | Ider-DNA                     | 2.60     | 0.229/0.273             | (Wisedchaisri <i>et al.</i> , 2007)    | 1.07/26                 | 45                  |
| 2ivm | Mtb regulatory protein       | 2.5      | 0.201/0.255             | (Shrivastava & Ramachandran, 2007)     | 0.72/26                 | 41                  |
| 2p6t | NG regulator                 | 2.9      | 0.239/0.300             | (Ren <i>et al.</i> , 2007)             | 1.03/26                 | 40                  |

|      |                    |      |              |                                        |         |    |
|------|--------------------|------|--------------|----------------------------------------|---------|----|
| 2zny | FFRP               | 2.59 | 0.54/0.258   | (Yamada <i>et al.</i> , 2009)          | 0.69/26 | 41 |
| 3cta | Riboflavin kinase  | 2.20 | 0.237/0.270  | PDB                                    | 0.98/26 | 47 |
| 3eco | MepR               | 2.40 | 0.242/0.289  | (Kumaraswami <i>et al.</i> , 2009)     | 1.17/26 | 43 |
| 3f22 | Zalpha-DNA         | 2.50 | 0.224/0.269  | (Ha <i>et al.</i> , 2009)              | 0.93/26 | 44 |
| 3hrt | ScaR               | 2.80 | 0.230/0.282  | (Stoll <i>et al.</i> , 2009)           | 1.05/26 | 45 |
| 3jsp | LexA-DNA           | 2.90 | 0.267/0.287  | (Zhang <i>et al.</i> , 2010)           | 2.65/27 | 47 |
| 3ngo | CNOT6L<br>nuclease | 2.20 | 0.217/0.263§ | PDB                                    | 0.89/26 | 43 |
| 2q5f | LMNASK1            | 1.90 | 0.189/0.222  | (Poncet-Montange <i>et al.</i> , 2007) | 1.1/26  | 42 |

\* number of equivalent C $\alpha$ -atoms used by DALI.

\*\* number of C $\alpha$ -atoms in the pdb files used for ARCIMBOLDO trials.

**Table S4** Helix-turn-helix motif plus DNA-fragment

| PDB  | Description                       | Res [Å] | R           | reference                             | rmsd* |
|------|-----------------------------------|---------|-------------|---------------------------------------|-------|
| 1akh | MAT $\alpha$ 1/MAT $\alpha$ 2-DNA | 2.50    | 0.201/0.302 | (Li <i>et al.</i> , 1998)             | 0.43  |
| 1au7 | Pit-1/DNA                         | 2.30    | 0.230/0.302 | (Jacobson <i>et al.</i> , 1997)       | 0.73  |
| 1b8i | UBX/EXD-DNA                       | 2.40    | 0.224/0.304 | (Passner <i>et al.</i> , 1999)        | 0.36  |
| 1du0 | Homeodomain DNA                   | 2.00    | 0.237/0.270 | (Grant <i>et al.</i> , 2000)          | 0.59  |
| 1fjl | Drosophila<br>homeodomain-DNA     | 2.0     | 0.198/na    | (Wilson <i>et al.</i> , 1995)         | 0.39  |
| 1gt0 | POU/HMG/DNA                       | 2.60    | 0.232/0.285 | (Reményi <i>et al.</i> , 2003)        | 0.53  |
| 1yrn | MAT $\alpha$ 1/MAT $\alpha$ 2-DNA | 2.50    | 0.225/0.298 | (Li <i>et al.</i> , 1995)             | 0.41  |
| 2d5v | HNF6 $\alpha$ -DNA                | 2.00    | 0.247/0.269 | (Iyaguchi <i>et al.</i> , 2007)       | 0.63  |
| 2h1k | Pdsx homeodomain<br>DNA           | 2.42    | 0.227/0.277 | (Longo <i>et al.</i> , 2007)          | 0.60  |
| 2hdd | Engrailed homeodomain<br>DNA      | 1.90    | 0.205/0.251 | (Tucker-Kellogg <i>et al.</i> , 1997) | 0.52  |
| 2r5z | Hox-DNA                           | 2.60    | 0.233/0.303 | (Joshi <i>et al.</i> , 2007)          | 0.39  |
| 9ant | Antennapeida-<br>homeodomain DNA  | 2.40    | 0.218/0.239 | (Fraenkel & Pabo, 1998)               | 0.41  |

\* root-mean-square deviation of 31 equivalent C-alpha atoms treated as one rigid block compared to the correct solution of 3RKQ.

## References

- DeWitt, M. A., Kliegman, J. I., Helmann, J. D., Brennan, R. G., Farrens, D. L. & Glasfeld, A. (2007). *J. Mol. Biol.* **365**, 1257-1265.
- Elrod-Erickson, M., Benson, T. E. & Pabo, C. O. (1998). *Structure* **6**, 451-464.
- Fairall, L., Schwabe, J. W. R., Chapman, L., Finch, J. T. & Rhodes, D. (1993). *Nature* **366**, 483-487.
- Fraenkel, E. & Pabo, C. O. (1998). *Nat. Struct. Biol.* **5**, 692-697.
- Grant, R. A., Rould, M. A., Klemm, J. D. & Pabo, C. O. (2000). *Biochemistry* **39**, 8187-8192.
- Ha, S. C., Choi, J., Hwang, H.-Y., Rich, A., Kim, Y.-G. & Kim, K. K. (2009). *Nucleic Acids Res.* **37**, 629-637.
- Houbaviy, H. B., Usheva, A., Shenk, T. & Burley, S. K. (1996). *PNAS* **93**, 13577-13582.
- Iyaguchi, D., Yao, M., Watanabe, N., Nishihira, J. & Tanaka, I. (2007). *Structure* **15**, 75-83.
- Jacobson, E. M., Li, P., Leon-del-Rio, A., Rosenfeld, M. G. & Aggarwal, A. K. (1997). *Genes Dev.* **11**, 198-212.
- Joshi, R., Passner, J. M., Rohs, R., Jain, R., Sosinsky, A., Crickmore, M. A., Jacob, V., Aggarwal, A. K., Honig, B. & Mann, R. S. (2007). *Cell* **131**, 530-543.
- Kim, C. A. & Berg, J. M. (1996). *Nat. Struct. Biol.* **3**, 940-945.
- Kumaraswami, M., Schuman, J. T., Seo, S. M., Kaatz, G. W. & Brennan, R. G. (2009). *Nucleic Acids Res.* **37**, 1211-1224.
- LaRonde-LeBlanc, N., Guszczynski, T., Copeland, T. & Wlodawer, A. (2005). *FEBS Journal* **272**, 2800-2810.
- LaRonde-LeBlanc, N. & Wlodawer, A. (2004). *Structure* **12**, 1585-1594.
- Lee, B. M., Xu, J., Clarkson, B. K., Martinez-Yamout, M. A., Dyson, H. J., Case, D. A., Gottesfeld, J. M. & Wright, P. E. (2006). *J. Mol. Biol.* **357**, 275-291.
- Lee, S., Doddapaneni, K., Hogue, A., McGhee, L., Meyers, S. & Wu, Z. (2010). *J. Mol. Biol.* **397**, 1055-1066.
- Li, T., Jin, Y., Vershon, A. K. & Wolberger, C. (1998). *Nucleic Acids Res.* **26**, 5707-5718.
- Li, T., Stark, M. R., Johnson, A. D. & Wolberger, C. (1995). *Science* **270**, 262-269.
- Longo, A., Guanga, G. P. & Rose, R. B. (2007). *Biochemistry* **46**, 2948-2957.
- Lu, D. & Klug, A. (2007). *Proteins* **67**, 508-512.
- Lu, D., Searles, M. A. & Klug, A. (2003). *Nature* **426**, 96-100.
- Miller, J. C. & Pabo, C. O. (2001). *J. Mol. Biol.* **313**, 309-315.
- Mishra, A., Eathiraj, S., Corvera, S. & Lambright, D. G. (2010). *PNAS* **107**, 10866-10871.
- Nolte, R. T., Conlin, R. M., Harrison, S. C. & Brown, R. S. (1998). *PNAS* **95**, 2938-2943.
- Passner, J. M., Ryoo, H. D., Shen, L., Mann, R. S. & Aggarwal, A. K. (1999). *Nature* **397**, 714-719.
- Pavletich, N. P. & Pabo, C. O. (1991). *Science* **252**, 809-817.
- Pavletich, N. P. & Pabo, C. O. (1993). *Science* **261**, 1701-1707.
- Peisach, E. & Pabo, C. O. (2003). *J. Mol. Biol.* **330**, 1-7.
- Petosa, C., Morand, P., Baudin, F., Moulin, M., Artero, J.-B. & Müller, C. W. (2006). *Mol. Cell* **21**, 565-572.
- Poncet-Montange, G., Assairi, L., Arold, S., Pochet, S. & Labesse, G. (2007). *J. Biol. Chem.* **282**, 33925-33934.
- Reményi, A., Lins, K., Nissen, L. J., Reinbold, R., Schöler, H. R. & Wilmanns, M. (2003). *Genes Dev.* **17**, 2048-2059.
- Ren, J., Sainsbury, S., Combs, S. E., Capper, R. G., Jordan, P. W., Berrow, N. S., Stammers, D. K., Saunders, N. J. & Owens, R. J. (2007). *J. Biol. Chem.* **282**, 14655-14664.
- Schuetz, A., Nana, D., Rose, C., Zocher, G., Milanovic, M., Koenigsmann, J., Blasig, R., Heinemann, U. & Carstanjen, D. (2011). *Cell. Mol. Life Sci.* **68**, 3121-3131.
- Segal, D. J., Crotty, J. W., Bhakta, M. S., Barbas, C. F., III & Horton, N. C. (2006). *J. Mol. Biol.* **363**, 405-421.
- Shrivastava, T. & Ramachandran, R. (2007). *Nucleic Acids Res.* **35**, 7324-7335.
- Sorenson, M. K., Ray, S. S. & Darst, S. A. (2004). *Mol. Cell* **14**, 127-138.

- Stoll, K. E., Draper, W. E., Kliegman, J. I., Golynskiy, M. V., Brew-Appiah, R. A. T., Phillips, R. K., Brown, H. K., Breyer, W. A., Jakubovics, N. S., Jenkinson, H. F., Brennan, R. G., Cohen, S. M. & Glasfeld, A. (2009). *Biochemistry* **48**, 10308-10320.
- Stoll, R., Lee, B. M., Debler, E. W., Laity, J. H., Wilson, I. A., Dyson, H. J. & Wright, P. E. (2007). *J. Mol. Biol.* **372**, 1227-1245.
- Tahirov, T. H., Sato, K., Ichikawa-Iwata, E., Sasaki, M., Inoue-Bungo, T., Shiina, M., Kimura, K., Takata, S., Fujikawa, A., Morii, H., Kumasaka, T., Yamamoto, M., Ishii, S. & Ogata, K. (2002). *Cell* **108**, 57-70.
- Tucker-Kellogg, L., Rould, M. A., Chambers, K. A., Ades, S. E., Sauer, R. T. & Pabo, C. O. (1997). *Structure* **5**, 1047-1054.
- Tuske, S., Sarafianos, S. G., Wang, X., Hudson, B., Sineva, E., Mukhopadhyay, J., Birktoft, J. J., Leroy, O., Ismail, S., Clark, A. D., Jr., Dharia, C., Napoli, A., Laptenko, O., Lee, J., Borukhov, S., Ebright, R. H. & Arnold, E. (2005). *Cell* **122**, 541-552.
- Wang, B. S., Grant, R. A. & Pabo, C. O. (2001). *Nat. Struct. Biol.* **8**, 589-593.
- Wilson, D. S., Guenther, B., Desplan, C. & Kuriyan, J. (1995). *Cell* **82**, 709-719.
- Wisedchaisri, G., Chou, C. J., Wu, M., Roach, C., Rice, A. E., Holmes, R. K., Beeson, C. & Hol, W. G. J. (2007). *Biochemistry* **46**, 436-447.
- Wolfe, S. A., Grant, R. A., Elrod-Erickson, M. & Pabo, C. O. (2001). *Structure* **9**, 717-723.
- Wolfe, S. A., Grant, R. A. & Pabo, C. O. (2003). *Biochemistry* **42**, 13401-13409.
- Wu, R.-Y., Zhang, R.-G., Zagnitko, O., Dementieva, I., Maltsev, N., Watson, J. D., Laskowski, R., Gornicki, P. & Joachimiak, A. (2003). *J. Biol. Chem.* **278**, 20240-20244.
- Yamada, M., Ishijima, S. A. & Suzuki, M. (2009). *Proteins* **74**, 520-525.
- Zhang, A. P. P., Pigli, Y. Z. & Rice, P. A. (2010). *Nature* **466**, 883-886.
- Zhang, W., Xu, C., Bian, C., Tempel, W., Crombet, L., MacKenzie, F., Min, J., Liu, Z. & Qi, C. (2011). *Biochem. Biophys. Res. Commun.* **413**, 58-61.
